# Supplementary material
Source: publisher figshare collection journal article supplement (https://acs.figshare.com/ndownloader/files/7303439)
Supplement: Supplementary file 1 [file 7303439]

Supporting Information for

**Perovskite/Poly(3-hexylthiophene)/Graphene Multiheterojunction  
Phototransistors with Ultrahigh Gain in Broadband Wavelength  
Region**

Chao Xie and Feng Yan\*

*Department of Applied Physics, The Hong Kong Polytechnic University, Hong Kong,  
China*

\* E-mail: apafyan@polyu.edu.hk

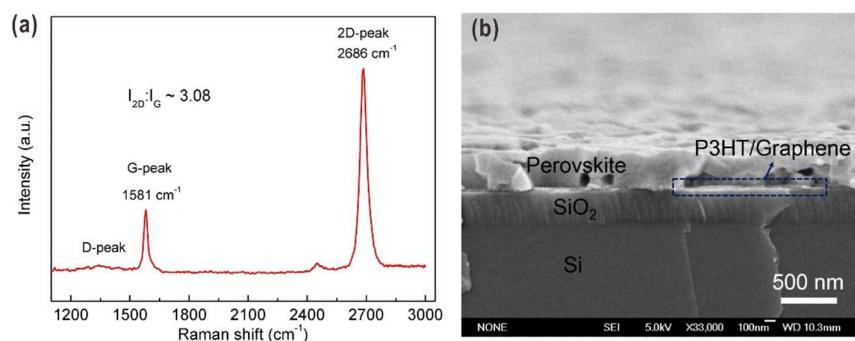

Fig. S1 (a) Raman spectrum of the graphene film on SiO<sub>2</sub>/Si substrate. The large intensity ratio of  $I_{2D}:I_G$  ( $\sim 3.08$ ), combined with the weak  $D$  peak at  $\sim 1343$  cm<sup>-1</sup>, suggests good crystal quality of the monolayer graphene. (b) Cross-sectional SEM image of the CH<sub>3</sub>NH<sub>3</sub>PbI<sub>3-x</sub>Cl<sub>x</sub> perovskite/P3HT/graphene multiheterojunction on SiO<sub>2</sub>/Si substrate.

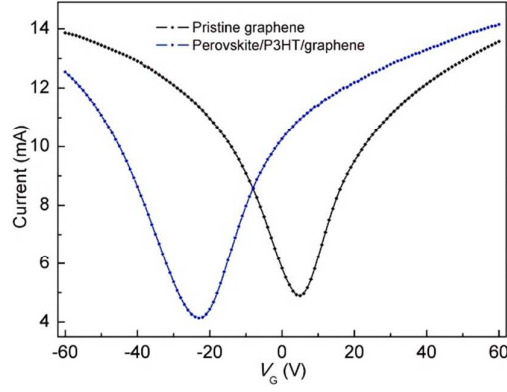

Fig. S2 Channel current of pristine graphene and  $\text{CH}_3\text{NH}_3\text{PbI}_{3-x}\text{Cl}_x$  perovskite/P3HT/graphene measured under dark environment.

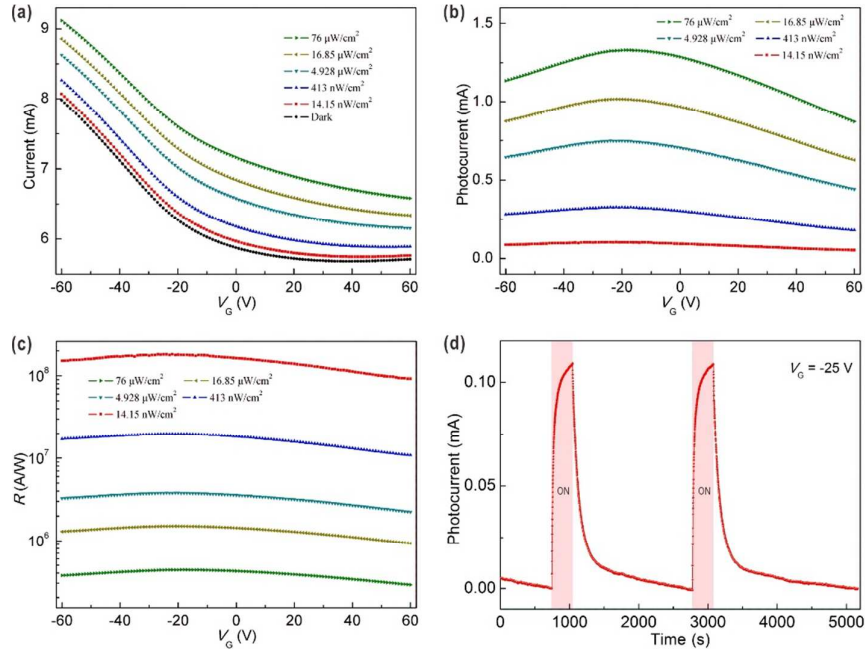

Fig. S3 (a) Channel current of the  $\text{CH}_3\text{NH}_3\text{PbI}_{3-x}\text{Cl}_x$  perovskite/graphene phototransistor as a function of back-gate ( $V_G$ ) under different illumination levels. Wavelength: 598 nm,  $V_{\text{DS}}=0.1$  V. (b) Photocurrent and (c) responsivity ( $R$ ) of the phototransistor as a function of  $V_G$  under different illumination levels. (d) Time-dependent photoresponse of the phototransistor to periodical on/off illumination (intensity:  $14.15 \text{ nW}/\text{cm}^2$ ) at  $V_G=-25$  V,  $V_{\text{DS}}=0.1$  V.

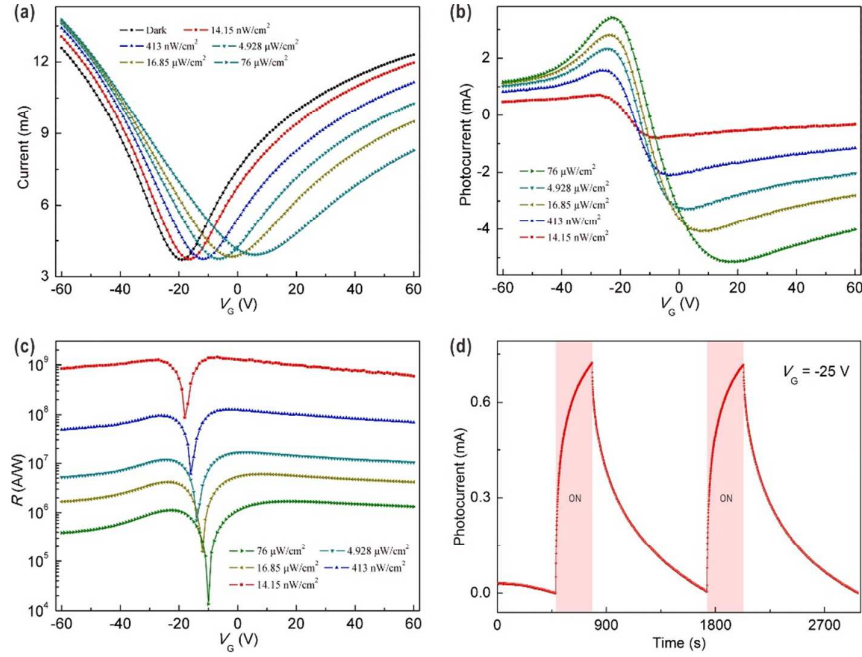

Fig. S4 (a) Channel current of the  $\text{CH}_3\text{NH}_3\text{PbI}_3$  perovskite/P3HT/graphene phototransistor as a function of back-gate ( $V_G$ ) under different illumination levels. Wavelength: 598 nm,  $V_{\text{DS}}=0.1$  V. (b) Photocurrent and (c) responsivity ( $R$ ) of the phototransistor as a function of  $V_G$  under different illumination levels. (d) Time-dependent photoresponse of the phototransistor to periodical on/off illumination (intensity: 14.15 nW/cm<sup>2</sup>) at  $V_G=-25$  V,  $V_{\text{DS}}=0.1$  V.

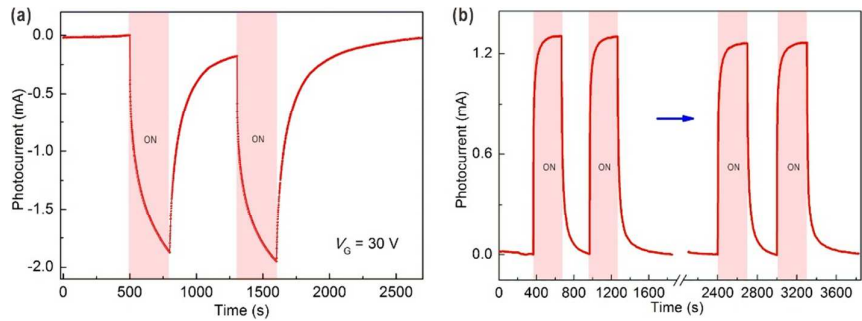

Fig S5 Time-dependent photoresponse of the  $\text{CH}_3\text{NH}_3\text{PbI}_{3-x}\text{Cl}_x$  perovskite/P3HT/graphene phototransistor to periodical on/off illumination (intensity: 14.15 nW/cm<sup>2</sup>) (a) at  $V_G=30$  V,  $V_{\text{DS}}=0.1$  V; (b) at  $V_G=-25$  V,  $V_{\text{DS}}=0.1$  V after being stored in a glovebox for ~4 weeks.

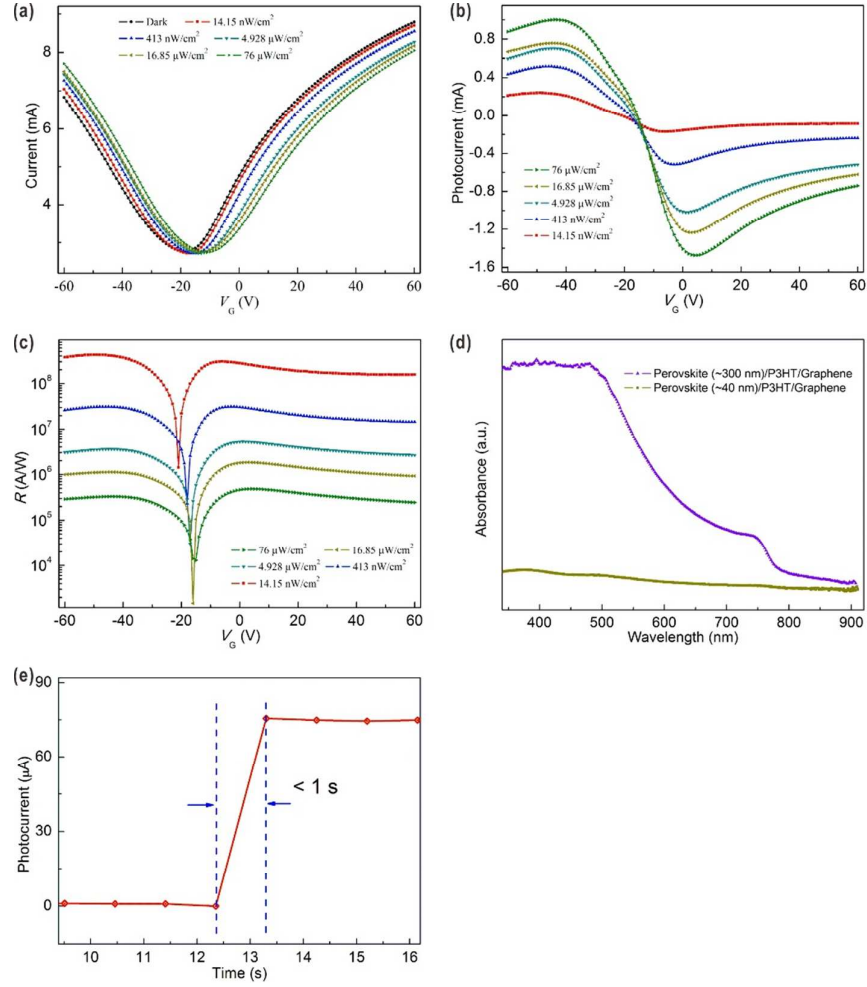

Fig S6 (a) Channel current of the CH<sub>3</sub>NH<sub>3</sub>PbI<sub>3-x</sub>Cl<sub>x</sub> perovskite (~40 nm)/P3HT/graphene phototransistor as a function of back-gate ( $V_G$ ) under different illumination levels. Wavelength: 598 nm,  $V_{DS}$ =0.1 V. (b) Photocurrent and (c) responsivity ( $R$ ) of the phototransistor as a function of  $V_G$  under different illumination levels. (d) Absorption spectrum of the CH<sub>3</sub>NH<sub>3</sub>PbI<sub>3-x</sub>Cl<sub>x</sub> perovskite (~40 nm)/P3HT/graphene film on glass, along with that of the CH<sub>3</sub>NH<sub>3</sub>PbI<sub>3-x</sub>Cl<sub>x</sub> perovskite (~300 nm)/P3HT/graphene film for comparison. (e) Enlarged view of the rising edge of the time-dependent photoresponse, which shows the rising time of the phototransistor.
